# Supplementary material for: A nematode-derived, mitochondrial stress signaling-regulated peptide exhibits broad antibacterial activity
Source: PubMed Central journal article supplement (PMC8181894; doi:10.1242/bio.058613), 2021-05-20
Supplement: biolopen-10-058613-s1.pdf [file biolopen-10-058613-s1.pdf]

## SUPPLEMENTARY TABLES

Table S1. The physical properties of CNC-4.

|                                                     |                                                       |
|-----------------------------------------------------|-------------------------------------------------------|
| <b>Amino acid sequence</b>                          | QWGYGPTYGGYGGGYPGMYGGYGMRPYGMYGG<br>YGMGMYRPGLLGMLIGK |
| <b>Net charge (pH 7)/pI</b>                         | 3/9.52                                                |
| <b>Theoretical MW,mass</b>                          | 5116.9, 7.1kD                                         |
| <b>Polar/non-polar residues (%)</b>                 | 0.067                                                 |
| <b>Hydrophobic face residues</b>                    | MGYMGYYYYPYMGYYGPG                                    |
| <b>Hydrophobicity&lt;H&gt;</b>                      | 0.537                                                 |
| <b>Hydrophobic moment&lt; <math>\mu</math>H&gt;</b> | 0.099                                                 |

**Table S2. List of plasmids used in this study.**

| <b>Plasmids</b>                    | <b>Comments</b>                                   | <b>References</b> |
|------------------------------------|---------------------------------------------------|-------------------|
| pMMB67EHTet                        | pMMB67EH with tetracycline resistance gene, (Tet) | PMID: 32591801    |
| pMMB67EH with lpp ompA cecropin P1 | pMMB67EH with lpp-OmpA-tether (Amp)               | PMID: 29307492    |
| pMIK102 (SLAY)                     | pMMB67EHTet with lpp-OmpA-tether, (Tet)           | PMID: 32591801    |
| SLAY-CNC-4 (1-48)                  | Full length CNC-4 cloned into pMIK102             | This study        |
| SLAY-CNC-4(1-36)                   | 1-36 residues CNC-4 cloned into pMIK102           | This study        |
| SLAY-CNC-4(1-24)                   | 1-24 residues CNC-4 cloned into pMIK102           | This study        |
| SLAY-CNC-4(1-12)                   | 1-12 residues CNC-4 cloned into pMIK102           | This study        |
| SLAY-CNC-4(1-8)                    | 1-8 residues CNC-4 cloned into pMIK102            | This study        |

**Table S3. List of bacterial strains used in this study.**

| <b>Strains</b>                                                | <b>Source</b>                              |
|---------------------------------------------------------------|--------------------------------------------|
| <i>P. aeruginosa</i> PAO1                                     | Joao Xavier (MSKCC)                        |
| <i>P. aeruginosa</i> PA14                                     | Joao Xavier (MSKCC)                        |
| <i>E. coli</i> W3110                                          | <i>E. coli</i> Genetic Stock Center (Yale) |
| <i>A. baumannii</i>                                           | ATCC17978                                  |
| <i>S. enterica</i> subsp. <i>enterica</i> serovar Typhimurium | ATCC 700720                                |
| <i>Staphylococcus saprophyticus</i>                           | ATCC 15305                                 |
| <i>Enterococcus faecalis</i>                                  | ATCC 29212                                 |
| <i>Staphylococcus epidermidis</i>                             | ATCC 12228                                 |
